# Supplementary material for: Independent effects on cellular and humoral immune responses underlie genotype-by-genotype interactions between Drosophila and parasitoids
Source: PubMed Central journal article supplement (PMC6797232; doi:10.1371/journal.ppat.1008084), 2019-10-07
Supplement: ppat.1008084.s001.pdf [file ppat.1008084.s001.pdf]

| Phenotype              | Figure | Sample Type                        | Treatment    | Host Genotype (DGRP line) |     |     |     |     |     |
|------------------------|--------|------------------------------------|--------------|---------------------------|-----|-----|-----|-----|-----|
|                        |        |                                    |              | 437                       | 491 | 566 | 589 | 748 | 892 |
| Larval encapsulation   | 1A     | Single larva dissection            | G486         | 37                        | 64  | 56  | 73  | 73  | 61  |
|                        |        |                                    | NSRef        | 41                        | 53  | 56  | 45  | 45  | 58  |
| Oil melanization       | 1B     | Single larva dissection            | No Infection | 39                        | 43  | 65  | 46  | 54  | 56  |
|                        |        |                                    | G486         | 38                        | 27  | 50  | 21  | 52  | 30  |
|                        |        |                                    | NSRef        | 15                        | 9   | 41  | 16  | 40  | 34  |
| Hemocyte counts        | 2      | Hemolymph pooled from 10-12 larvae | No Infection | 17                        | 11  | 14  | 15  | 14  | 17  |
|                        |        |                                    | G486         | 11                        | 5   | 6   | 8   | 10  | 8   |
|                        |        |                                    | NSRef        | 13                        | 5   | 10  | 11  | 10  | 7   |
| <i>Tep1</i> expression | 3A     | RNA pooled from 10 larvae          | No Infection | 8                         | 8   | 8   | 8   | 8   | 8   |
|                        |        |                                    | G486         | 8                         | 8   | 8   | 8   | 8   | 8   |
|                        |        |                                    | NSRef        | 8                         | 8   | 8   | 8   | 8   | 8   |
| PO activity            | 3B     | Hemolymph pooled from 20-25 larvae | No Infection | 12                        | 10  | 12  | 8   | 12  | 11  |
|                        |        |                                    | G486         | 12                        | 9   | 12  | 7   | 12  | 10  |
|                        |        |                                    | NSRef        | 12                        | 8   | 12  | 10  | 12  | 10  |
| Adult encapsulation    | S1     | Groups of 40 animals               | G486         | 8                         | 5   | 8   | 8   | 5   | 3   |
|                        |        |                                    | NSRef        | 8                         | 5   | 8   | 8   | 5   | 4   |
